# Supplementary material for: German Value Set for the EQ-5D-5L
Source: Springer Nature journal article supplement (doi:10.1007/s40273-018-0615-8), 2018-02-19
Supplement: MOESM2 [file 24130488]

**Title: German value set for the EQ-5D-5L**

**Journal:** PharmacoEconomics

**Authors:** Kristina Ludwig, J-Matthias Graf von der Schulenburg, Wolfgang Greiner

**Corresponding author:** Kristina Ludwig, Health Economics and Health Care Management, Bielefeld University, E-mail: kristina.ludwig@uni-bielefeld.de

**Supplementary material 2: Full value set model for the German version of the EQ-5D-5L**

| Independent variables of the model       | Model 3b (Value Set):<br>Hybrid censoring at -1 and correcting for<br>heteroskedasticity<br>(cTTO + DCE model) |       |
|------------------------------------------|----------------------------------------------------------------------------------------------------------------|-------|
|                                          | $\beta$ (SE)                                                                                                   | p     |
| <b>Levels of the EQ-5D-5L dimensions</b> |                                                                                                                |       |
| MO2: slight problems                     | 0.026 (0.006)                                                                                                  | 0.000 |
| MO3: moderate problems                   | 0.042 (0.009)                                                                                                  | 0.000 |
| MO4: severe problems                     | 0.139 (0.009)                                                                                                  | 0.000 |
| MO5: unable                              | 0.224 (0.009)                                                                                                  | 0.000 |
| SC2: slight problems                     | 0.050 (0.006)                                                                                                  | 0.000 |
| SC3: moderate problems                   | 0.056 (0.008)                                                                                                  | 0.000 |
| SC4: severe problems                     | 0.169 (0.009)                                                                                                  | 0.000 |
| SC5: unable                              | 0.260 (0.008)                                                                                                  | 0.000 |
| UA2: slight problems                     | 0.036 (0.006)                                                                                                  | 0.000 |
| UA3: moderate problems                   | 0.049 (0.008)                                                                                                  | 0.000 |
| UA4: severe problems                     | 0.129 (0.008)                                                                                                  | 0.000 |
| UA5: unable                              | 0.209 (0.008)                                                                                                  | 0.000 |
| PD2: slight problems                     | 0.057 (0.006)                                                                                                  | 0.000 |
| PD3: moderate problems                   | 0.109 (0.009)                                                                                                  | 0.000 |
| PD4: severe problems                     | 0.404 (0.010)                                                                                                  | 0.000 |
| PD5: extreme problems                    | 0.612 (0.011)                                                                                                  | 0.000 |
| AD2: slight problems                     | 0.030 (0.005)                                                                                                  | 0.000 |
| AD3: moderate problems                   | 0.082 (0.008)                                                                                                  | 0.000 |
| AD4: severe problems                     | 0.244 (0.008)                                                                                                  | 0.000 |
| AD5: extreme problems                    | 0.356 (0.009)                                                                                                  | 0.000 |
| <b>Model for Insigma</b>                 |                                                                                                                |       |
| MO2: slight problems                     | 0.223 (0.025)                                                                                                  | 0.000 |
| MO3: moderate problems                   | 0.236 (0.026)                                                                                                  | 0.000 |
| MO4: severe problems                     | 0.353 (0.029)                                                                                                  | 0.000 |
| MO5: unable                              | 0.346 (0.024)                                                                                                  | 0.000 |
| SC2: slight problems                     | 0.139 (0.024)                                                                                                  | 0.000 |
| SC3: moderate problems                   | 0.218 (0.028)                                                                                                  | 0.000 |
| SC4: severe problems                     | 0.323 (0.027)                                                                                                  | 0.000 |
| SC5: unable                              | 0.390 (0.024)                                                                                                  | 0.000 |
| UA2: slight problems                     | 0.190 (0.026)                                                                                                  | 0.000 |
| UA3: moderate problems                   | 0.320 (0.027)                                                                                                  | 0.000 |
| UA4: severe problems                     | 0.401 (0.028)                                                                                                  | 0.000 |
| UA5: unable                              | 0.258 (0.025)                                                                                                  | 0.000 |
| PD2: slight problems                     | 0.263 (0.023)                                                                                                  | 0.000 |
| PD3: moderate problems                   | 0.218 (0.028)                                                                                                  | 0.000 |
| PD4: severe problems                     | 0.437 (0.024)                                                                                                  | 0.000 |
| PD5: extreme problems                    | 0.630 (0.027)                                                                                                  | 0.000 |
| AD2: slight problems                     | 0.162 (0.025)                                                                                                  | 0.000 |
| AD3: moderate problems                   | 0.378 (0.028)                                                                                                  | 0.000 |
| AD4: severe problems                     | 0.576 (0.027)                                                                                                  | 0.000 |
| AD5: extreme problems                    | 0.556 (0.025)                                                                                                  | 0.000 |
| Constant                                 | -2.11 (0.028)                                                                                                  | 0.000 |

AD: anxiety/depression; cTTO: composite time trade-off, DCE: discrete choice experiment; MO: mobility; PD: pain/discomfort; SC: self-care; SE: standard error; UA: usual activities
